# Supplementary material for: Sex Differences in Ependymoma Methylation by Methylation‐Defined Subgroup
Source: PubMed Central journal article supplement (PMC11647990; doi:10.1111/jcmm.70286), 2024-12-16

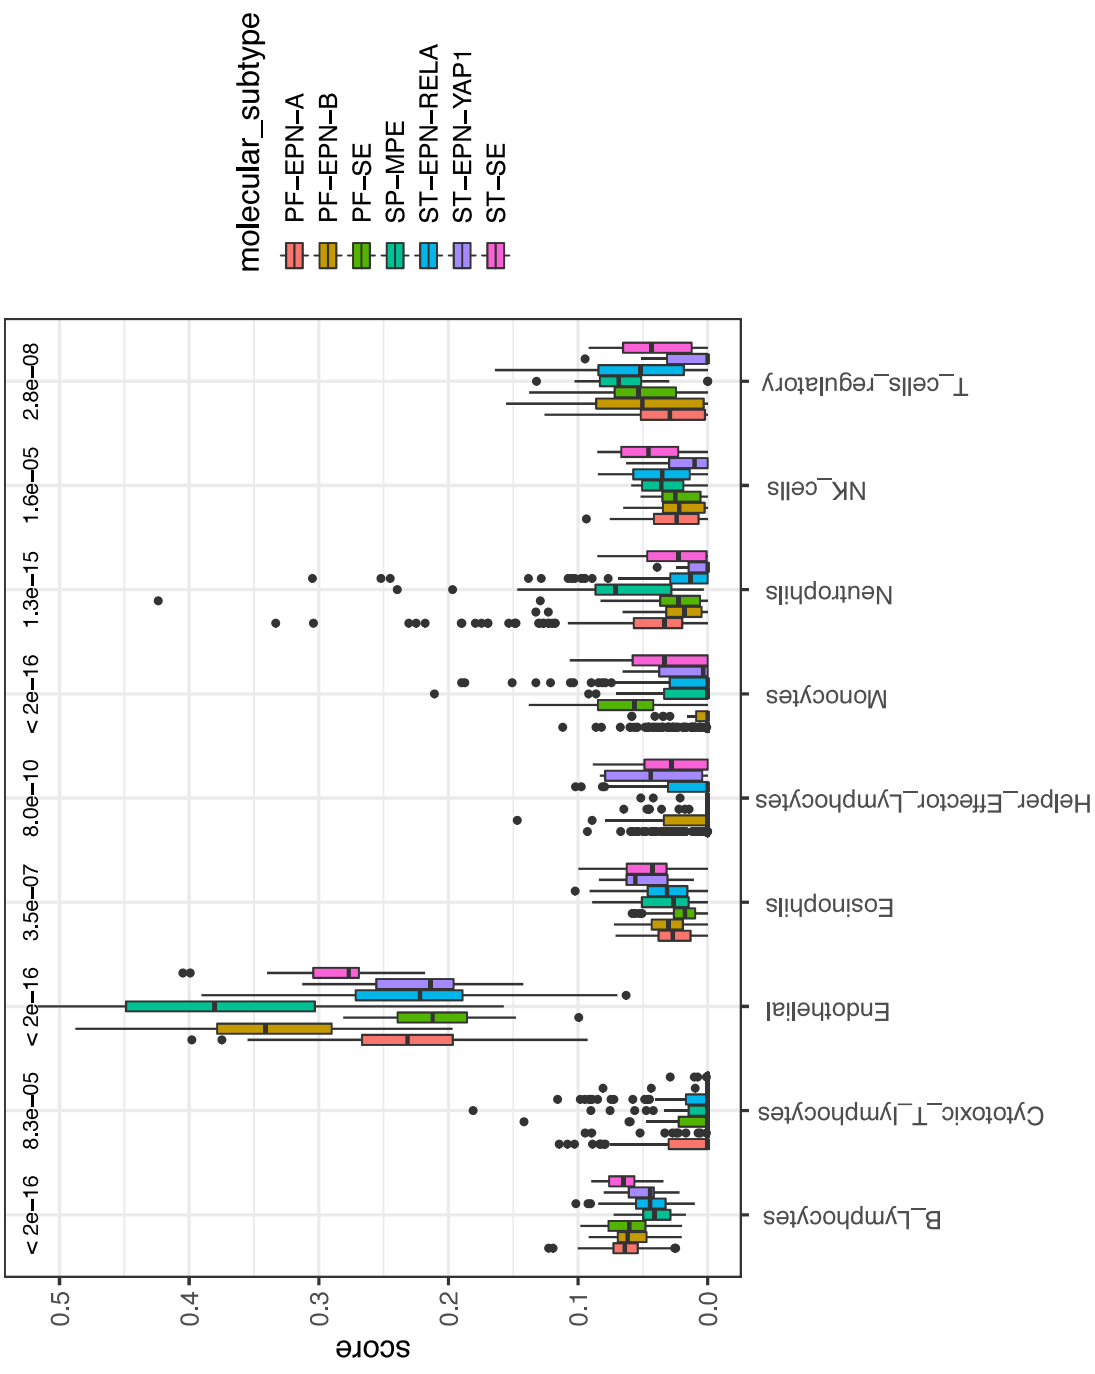

Supplement: JCMM-28-e70286-s001.pdf [file JCMM-28-e70286-s001.pdf]
